# Supplementary material for: Mo2C quantum dot embedded chitosan-derived nitrogen-doped carbon for efficient hydrogen evolution in a broad pH range
Source: Royal Society of Chemistry journal article supplement (doi:10.1039/c6cc06267a), 2016-01-01
Supplement: c6cc06267a1.pdf [file c6cc06267a1.pdf]

## Electronic Supporting Information

### Mo<sub>2</sub>C quantum dots embedded chitosan-derived nitrogen-doped carbon for efficient hydrogen evolution in a broad pH range

Zonghua Pu,<sup>a</sup> Min Wang,<sup>a</sup> Zongkui Kou,<sup>a</sup> Ibrahim Saana Amiinu,<sup>a</sup> and Shichun Mu<sup>a\*</sup>

<sup>a</sup> State Key Laboratory of Advanced Technology for Materials Synthesis and Processing, Wuhan University of Technology, Wuhan 430070, Hubei, China

\* E-mail: msc@whut.edu.cn

#### Experimental Section

**Materials:** Chitosan, ammonium molybdate ((NH<sub>4</sub>)<sub>6</sub>Mo<sub>7</sub>O<sub>24</sub>•4H<sub>2</sub>O) and sulfuric acid (H<sub>2</sub>SO<sub>4</sub>) were purchased from Beijing Chemical Works. Commercial Mo<sub>2</sub>C, potassium hydroxide (KOH), potassium phosphate (KH<sub>2</sub>PO<sub>4</sub>, K<sub>2</sub>HPO<sub>4</sub>) and ethanol were purchased from Aladdin Reagent. Nafion (5 wt%) and Pt/C (20 wt%) were purchased from Sigma-Aldrich. All the reagents in the experiment were analytical grade and used without further treatments. Deionized Mini-Q water was used as solvent.

**Preparation of Mo<sub>2</sub>C QDs/NGCLs:** 1.0 g (NH<sub>4</sub>)<sub>6</sub>Mo<sub>7</sub>O<sub>24</sub>•4H<sub>2</sub>O and 1.0 g chitosan were dissolved in water via ultrasonication for 20 min. The solution was dried at 80 °C form homogeneous powder. The solid mixture was annealing at 900 °C for 2 h in Ar atmosphere. After cooled to room temperature naturally, the resulting products of Mo<sub>2</sub>C QDs/NGCLs were obtained.

**Preparation of NGCLs:** NGCLs were derived from pyrolysis of chitosan powder with the same temperature under Ar flow.

**Characterizations:** X-ray diffraction (XRD) patterns were collected on a Rigaku X-ray diffractometer equipped with a Cu K<sub>α</sub> radiation source. The morphology and structure were characterized by transmission electron microscopy (TEM, HITACHI H-8100). X-ray photoelectron spectroscopy (XPS) was obtained on an ESCALABMK

II X-ray photoelectron spectrometer. Raman shifts were recorded on a LabRAM Aramis Raman spectrometer instrument using the Ar ion laser with an excitation wavelength of 633 nm.

**Electrochemical characterization:** The electrochemical tests for HER were carried out with a CHI 660E electrochemical workstation using a three-electrode configuration cell. The Ag/AgCl (3.0 M KCl) and graphite rod were used as reference electrode and auxiliary electrode, respectively. Glass carbon electrode (GCE: diameter = 3 mm) modified by catalyst was used as working electrode. 10 mg catalyst and 10  $\mu$ l 5 wt% Nafion solution were dispersed in 990  $\mu$ l ethanol/water (v/v=1:1) mixed solvent by sonication 30 min. Then 14  $\mu$ l of the catalyst ink was loaded on a GCE (loading: 2.0 mg cm<sup>-2</sup>). The polarization curves were recorded in 0.5 M H<sub>2</sub>SO<sub>4</sub> (pH = 0), 1.0 M phosphate buffered solution (PBS, pH = 7) and 1.0 M KOH (pH = 14) with a scan rate of 2 mV s<sup>-1</sup> at room temperature (~25 °C), respectively. In all measurements, the Ag/AgCl reference electrode was calibrated with respect to reversible hydrogen electrode (RHE) by adding a value of (0.197 + 0.059 pH) V. EIS measurements were carried out in the frequency range of 100 kHz–0.01 Hz. All measured polarization curves were corrected for iR loss.

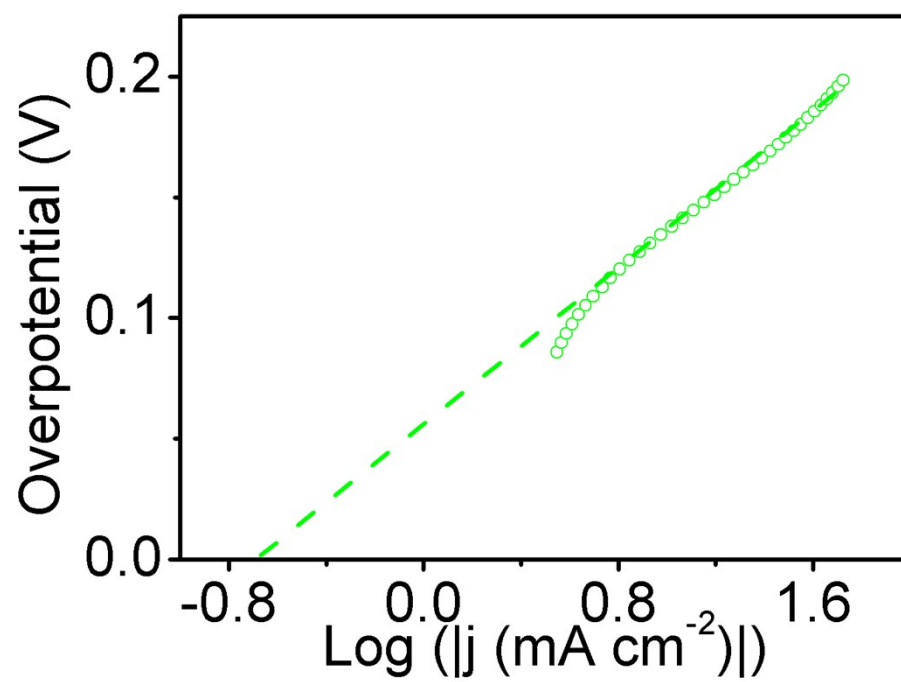

**Fig. S1.** Tafel plot of Mo<sub>2</sub>C QDs/NGCLs.

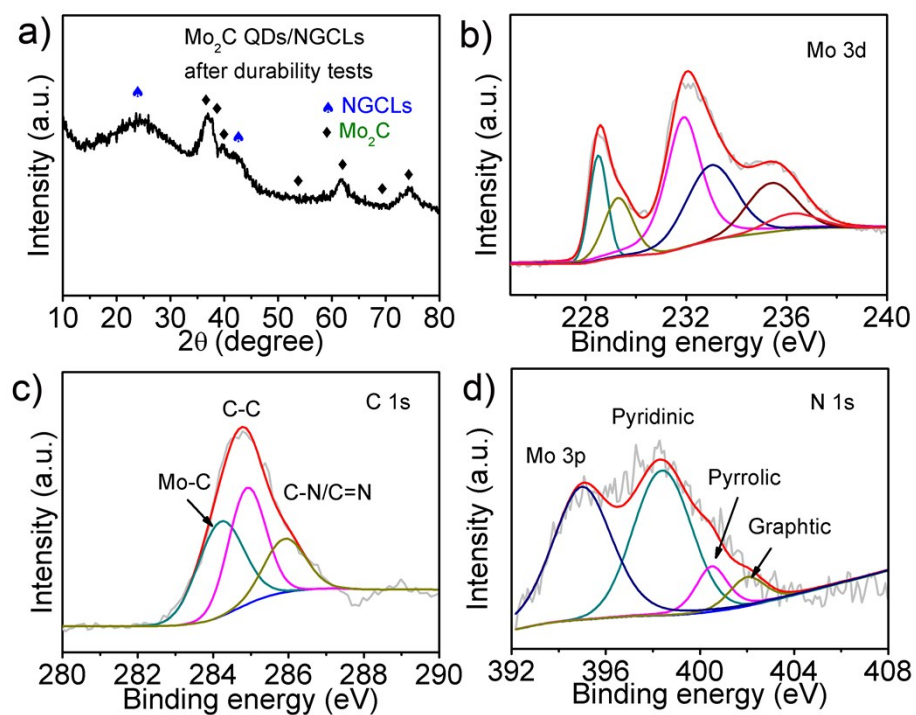

**Fig. S2** (b) XRD pattern and (b-c) the high-resolution XPS spectra of  $\text{Mo}_2\text{C}$  QDs/NGCLs after the durability tests.

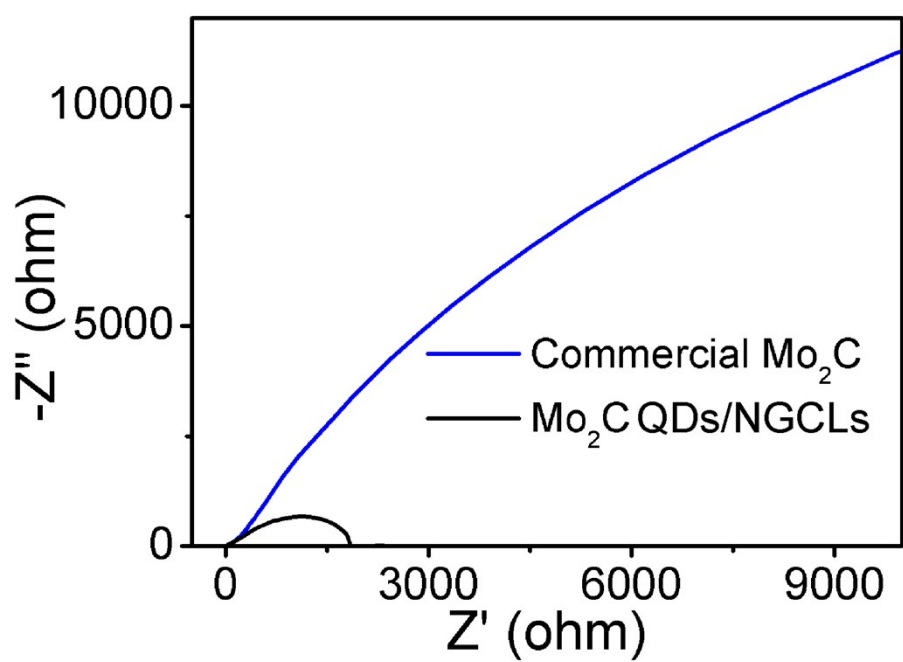

**Fig. S3** Nyquist plots of  $\text{Mo}_2\text{C}$  QDs/NGCLs and commercial  $\text{Mo}_2\text{C}$  in 0.5 M  $\text{H}_2\text{SO}_4$  at overpotential of 200 mV.

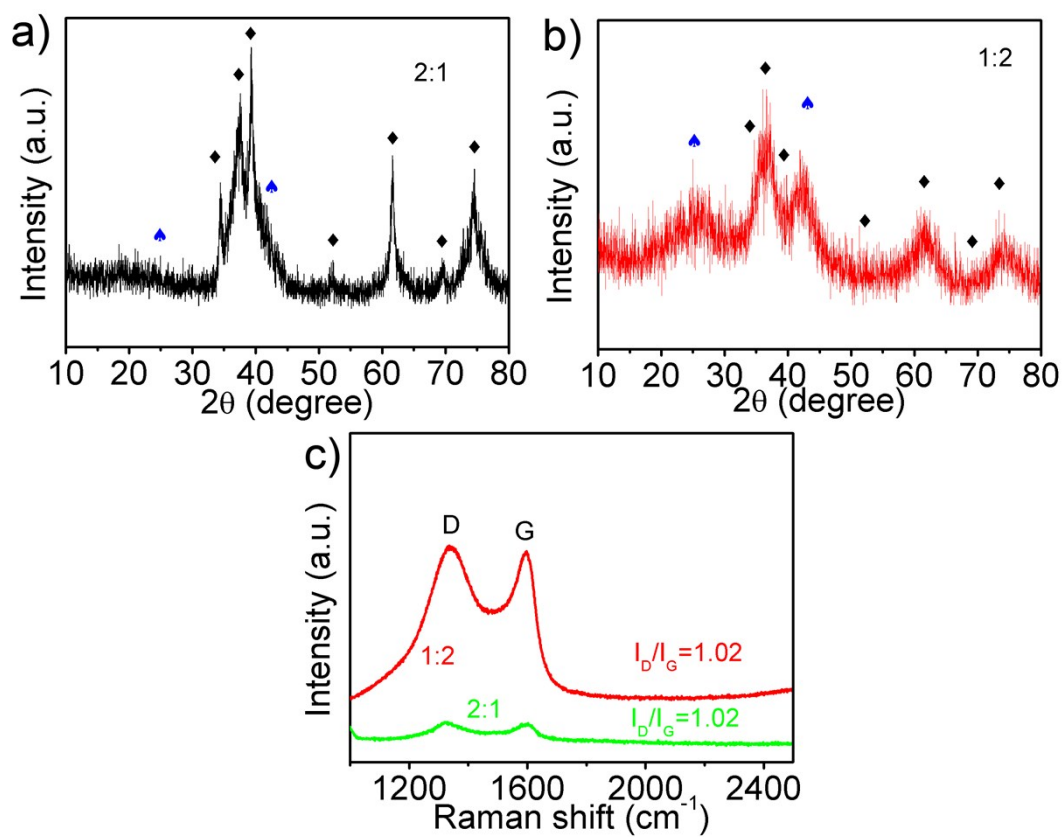

**Fig. S4** (a, b) XRD patterns and (c) Raman spectra for samples obtained from  $(\text{NH}_4)_6\text{Mo}_7\text{O}_{24} \cdot 4\text{H}_2\text{O}$  and chitosan with different initial mass ratios (2:1 and 1:2).

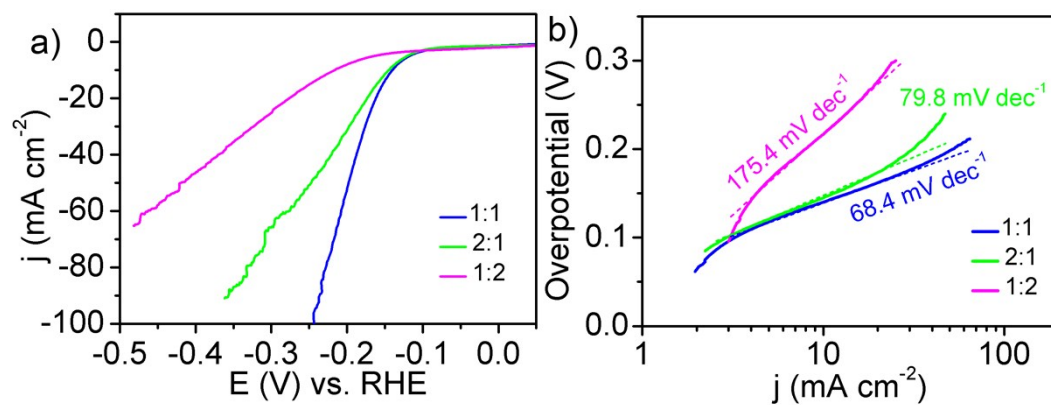

**Fig. S5.** (a) Polarization curves and (b) Tafel plots of the catalysts derived from ammonium molybdate and chitosan with different initial mass ratios.

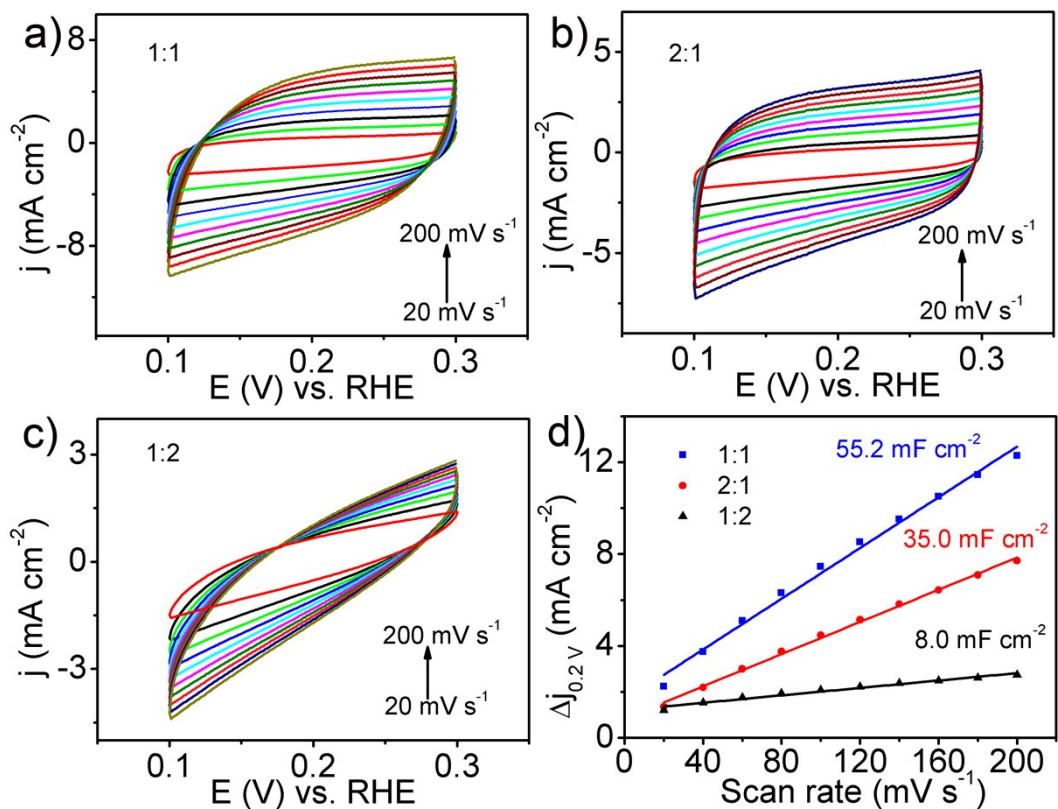

**Fig. S6** (a, b and c) CVs for samples obtained from  $(\text{NH}_4)_6\text{Mo}_7\text{O}_{24} \cdot 4\text{H}_2\text{O}$  and chitosan with different initial mass ratios (1:1, 2:1 and 1:2). (d) The capacitive current density at 0.2 V as a function of scan rate for samples in 0.5 M  $\text{H}_2\text{SO}_4$ .



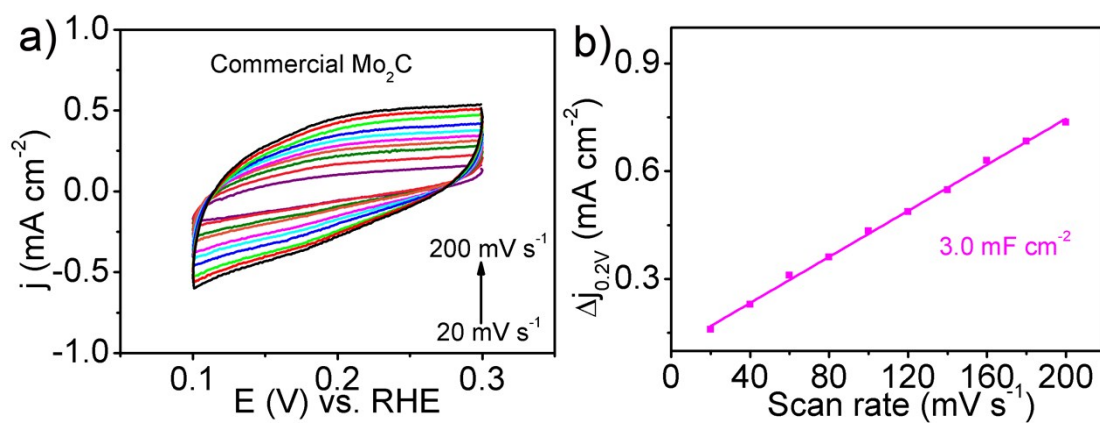

**Fig. S7** (a) CVs and (b) the capacitive current density at 0.2 V as a function of scan rate for commercial  $\text{Mo}_2\text{C}$  in  $0.5 \text{ M H}_2\text{SO}_4$ .

**Table S1** Comparison of HER performance in acidic media for Mo<sub>2</sub>C QD NCs/NGCLs with other Mo<sub>2</sub>C-based electrocatalysts.

| Catalyst                          | Loading<br>(mg cm <sup>-2</sup> ) | Electrolyte/pH                       | j (mA cm <sup>-2</sup> ) | Overpotential at the<br>corresponding j (mV) | j <sub>0</sub> (mA cm <sup>-2</sup> ) | Ref.      |
|-----------------------------------|-----------------------------------|--------------------------------------|--------------------------|----------------------------------------------|---------------------------------------|-----------|
| Mo <sub>2</sub> C QDs/NGCLs       | 2                                 | 0.5 M H <sub>2</sub> SO <sub>4</sub> | 10                       | 136                                          | 0.2                                   | This work |
| Mo <sub>2</sub> C/GCNs            | 0.36                              | 0.5 M H <sub>2</sub> SO <sub>4</sub> | 10                       | 200                                          | 0.0125                                | 1         |
| Bulk Mo <sub>2</sub> C            | 1.4                               | 1.0 M H <sub>2</sub> SO <sub>4</sub> | 10                       | 210                                          | 0.0013                                | 2         |
| Mo <sub>2</sub> C/CNT             | 2                                 | 0.1 M HClO <sub>4</sub>              | 10                       | 152                                          | 0.014                                 | 3         |
| Mo <sub>2</sub> C/XC              | 2                                 | 0.1 M HClO <sub>4</sub>              | 3                        | ~150                                         | 0.013                                 | 3         |
| Mo <sub>1</sub> Soy/RGO           | -                                 | 0.1 M HClO <sub>4</sub>              | 10                       | 177                                          | 0.037                                 | 4         |
| β-Mo <sub>2</sub> C               | 0.75                              | 0.5 M H <sub>2</sub> SO <sub>4</sub> | 10                       | 172                                          | 0.017                                 | 5         |
| Mo <sub>2</sub> C@NC              | 0.28                              | 0.5 M H <sub>2</sub> SO <sub>4</sub> | 10                       | 124                                          | 0.096                                 | 6         |
| Mo <sub>2</sub> C nanowires       | 0.21                              | 0.5 M H <sub>2</sub> SO <sub>4</sub> | 10                       | 130                                          | -                                     | 7         |
| MoC <sub>x</sub> nano-octahedrons | 0.8                               | 0.5 M H <sub>2</sub> SO <sub>4</sub> | 10                       | 142                                          | 0.23                                  | 8         |
| MoCN                              | 0.4                               | pH=1                                 | 10                       | 145                                          | -                                     | 9         |
| Mo <sub>2</sub> C/NCNT            | 3                                 | 0.5 M H <sub>2</sub> SO <sub>4</sub> | 10                       | 147                                          | 0.1146                                | 10        |
| 3D Mo <sub>x</sub> C/Ni network   | -                                 | 0.5 M H <sub>2</sub> SO <sub>4</sub> | 10                       | 150                                          | 0.1                                   | 11        |
| Mo <sub>2</sub> C nanowires       | ~0.28                             | 0.5 M H <sub>2</sub> SO <sub>4</sub> | 10                       | 200                                          | -                                     | 12        |
| Mo <sub>2</sub> C nanoparticles   | 0.102                             | 0.5 M H <sub>2</sub> SO <sub>4</sub> | 10                       | 198                                          | -                                     | 13        |

**Table S2** Comparison of HER performance in neutral media for Mo<sub>2</sub>C QDs/NGCLs with other Pt-free HER electrocatalyst.

| Catalyst                    | Electrolyte/pH | $j$ (mA cm <sup>-2</sup> ) | Overpotential at the corresponding $j$ (mV) | Ref.      |
|-----------------------------|----------------|----------------------------|---------------------------------------------|-----------|
| Mo <sub>2</sub> C QDs/NGCLs | 1.0 M PBS      | 2                          | 73                                          | This work |
|                             |                | 10                         | 136                                         |           |
| Bulk Mo <sub>2</sub> C      | pH= 7          | 1                          | 200                                         | 2         |
| Mo <sub>2</sub> C@NC        | 1.0 M PBS      | 10                         | 156                                         | 6         |
| Mo <sub>2</sub> C/NCNT      | 1.0 M PBS      | 10                         | 645                                         | 10        |
| MoP/CF                      | 1.0 M PBS      | 1                          | ~300                                        | 14        |
| MoS <sub>2</sub> /Mo        | 1.0 M PBS      | 2                          | 172                                         | 15        |
| WP NAs/CC                   | 1.0 M PBS      | 2                          | 95                                          | 16        |
| CoP/CC                      | 1.0 M PBS      | 2                          | 65                                          | 17        |
| Co-NRCNTs                   | 0.1 M PBS      | 2                          | 380                                         | 18        |
| FeP/Ti                      | 1.0 M PBS      | 10                         | 102                                         | 19        |
| H <sub>2</sub> -CoCat/FTO   | 1.0 M PBS      | 2                          | 385                                         | 20        |
| Co-S/FTO                    | 1.0 M PBS      | 2                          | 83                                          | 20        |
| CuMoS <sub>4</sub> crystals | 1.0 M PBS      | 2                          | 210                                         | 21        |

**Table S3** Comparison of HER performance in basic media for Mo<sub>2</sub>C QDs/NGCLs with other Pt-free HER electrocatalyst.

| Catalyst                          | Electrolyte/pH | $j$ (mA cm <sup>-2</sup> ) | Overpotential at the corresponding $j$ (mV) | Ref.      |
|-----------------------------------|----------------|----------------------------|---------------------------------------------|-----------|
| Mo <sub>2</sub> C QDs/NGCLs       | 1.0 M KOH      | 2                          | 73                                          | This work |
|                                   |                | 10                         | 111                                         |           |
| Bulk Mo <sub>2</sub> C            | 1.0 M KOH      | 10                         | 190                                         | 2         |
| β-Mo <sub>2</sub> C               | 0.1 M KOH      | 10                         | 197                                         | 5         |
| Mo <sub>2</sub> C@NC              | 1.0 M KOH      | 10                         | 60                                          | 6         |
| MoC <sub>x</sub> nano-octahedrons | 1.0 M KOH      | 10                         | 151                                         | 8         |
| Mo <sub>2</sub> C/NCNT            | 1.0 M KOH      | 10                         | 257                                         | 10        |
| Mo <sub>2</sub> C nanoparticles   | 1.0 M KOH      | 10                         | 176                                         | 13        |
| MoS <sub>2</sub> /Mo              | 1.0 M KOH      | 2                          | 172                                         | 15        |
| WP NAs/CC                         | 1.0 M KOH      | 10                         | 150                                         | 16        |
| CoP/CC                            | 1.0 M KOH      | 10                         | 209                                         | 17        |
| Co-NRCNTs                         | 1.0 M KOH      | 10                         | 370                                         | 18        |
| Co-S/FTO                          | 1.0 M KOH      | 1                          | 480                                         | 20        |
| Ni <sub>2</sub> P nanoparticles   | 1.0 M KOH      | 20                         | 250                                         | 22        |
| Ni wire                           | 1.0 M NaOH     | 10                         | 350                                         | 23        |
| Ni-Mo alloy/Ti foil               | 1.0 M NaOH     | 10                         | 80                                          | 23        |

## References

- 1 W. Cui, N. Cheng, Q. Liu, C. Ge, A. M. Asiri and X. Sun, *ACS Catal.*, 2014, **4**, 2658-2661.
- 2 H. Vrubel and X. Hu, *Angew. Chem. Int. Ed.*, 2012, **124**, 12875–12878.
- 3 W. Chen, C. Wang, K. Sasaki, N. Marinkovic, W. Xu, J. T. Muckerman, Y. Zhu and R. R. Adzic, *Energy Environ. Sci.*, 2013, **6**, 943–951.
- 4 W. Chen, S. Iyer, K. Sasaki, C. H. Wang, Y. Zhu, J. T. Muckerman and E. Fujita, *Energy Environ. Sci.*, 2013, **6**, 1818–1826.
- 5 F. Ma, H. Wu, B. Xia, C. Xu and X. Lou, *Angew. Chem. Int. Ed.*, 2015, **54**, 15395-15399.
- 6 Y. Liu, G. Yu, G. Li, Y. Sun, T. Asefa, W. Chen and X. Zou, *Angew. Chem. Int. Ed.*, 2015, **54**, 10752–10757.
- 7 L. Liao, S. Wang, J. Xiao, X. Bian, Y. Zhang, M. D. Scanlon, X. Hu, Y. Tang, B. Liu and H. H. Girault, *Energy Environ. Sci.*, 2014, **7**, 387-392.
- 8 H. Wu, B. Xia, L. Yu, X. Yu and X. Lou, *Nat. Commun.*, 2015, **6**, 6512.
- 9 Y. Zhao, K. Kamiya, K. Hashimoto and S. Nakanishi, *J. Am. Chem. Soc.*, 2015, **137**, 110-113.
- 10 K. Zhang, Y. Zhao, D. Fu and Y. Chen, *J. Mater. Chem. A*, 2015, **3**, 5783-5788.
- 11 J. Zhang, X. Meng, J. Zhao and Z. Zhu, *ChemCatChem*, 2014, **6**, 2059-2064.
- 12 C. Ge, P. Jiang, W. Cui, Z. Pu, Z. Xing, A. M. Asiri, A. Y. Obaid, X. Sun and J. Tian, *Electrochim. Acta*, 2014, **134**, 182-186.

- 13 L. Ma, L. Ting, V. Molinari, C. Giordano and B. S. Yeo, *J. Mater. Chem. A*, 2015, **3**, 8361-8368.
- 14 W. Cui, Q. Liu, Z. Xing, A. M. Asiri, K. A. Alamry and X. Sun, *Appl. Catal. B-Environ.*, 2015, **164**, 144-150.
- 15 Z. Pu, Q. Liu, A. M. Asiri and X. Sun, *Electrochim. Acta*, 2015, **168**, 133-138.
- 16 Z. Pu, Q. Liu, A. M. Asiri and X. Sun, *ACS Appl. Mater. Interfaces*, 2014, **6**, 21874-21879.
- 17 J. Tian, Q. Liu, A. M. Asiri and X. Sun, *J. Am. Chem. Soc.*, 2014, **136**, 7587-7590.
- 18 X. Zou, X. Huang, A. Goswami, R. Silva, B. R. Sathe, E. Mikmekova and T. Asefa, *Angew. Chem. Int. Ed.*, 2014, **126**, 4461-4465.
- 19 J. F. Callejas, J. M. McEnaney, C. G. Read, J. C. Crompton, A. J. Biacchi, E. J. Popczun, T. R. Gordon, N. S. Lewis and R. E. Schaak, *ACS Nano*, 2014, **8**, 11101-11107.
- 20 Y. Sun, L. Chong, D. Grauer, J. Yano, J. Long, P. Yang and C. Chang, *J. Am. Chem. Soc.*, 2013, **135**, 17699-17702.
- 21 P. Tran, M. Nguyen, S. Pramana, A. Bhattacharjee, S. Chiam, J. Fize, M. Field, V. Artero, L. Wong, J. Loo and J. Barber, *Energy Environ. Sci.*, 2012, **5**, 8912-8916.
- 22 L. Feng, H. Vrubel, M. Bensimon and X. Hu, *Phys. Chem. Chem. Phys.*, 2014, **16**, 5917-5921.
- 23 J. McKone, B. Sadtler, C. Werlang, N. S. Lewis and H. Gray, *ACS Catal.*, 2013,

**3, 166-169.**
